# Supplementary material for: Determining the link between hygroscopicity and composition for semi-volatile aerosol species
Source: Copernicus journal article supplement (doi:10.5194/amt-11-4361-2018), 2018-07-24
Supplement: Supplementary file 1 [file amt-11-4361-2018-supplement.pdf]

Supplement of Atmos. Meas. Tech., 11, 4361–4372, 2018  
<https://doi.org/10.5194/amt-11-4361-2018-supplement>  
© Author(s) 2018. This work is distributed under  
the Creative Commons Attribution 4.0 License.

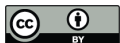

*Supplement of*

## **Determining the link between hygroscopicity and composition for semi-volatile aerosol species**

**Joel Alroe et al.**

*Correspondence to:* Zoran D. Ristovski (z.ristovski@qut.edu.au)

The copyright of individual parts of the supplement might differ from the CC BY 4.0 License.

### Timeseries for $\alpha$ -pinene SOA formation on AS seeds in a smog chamber

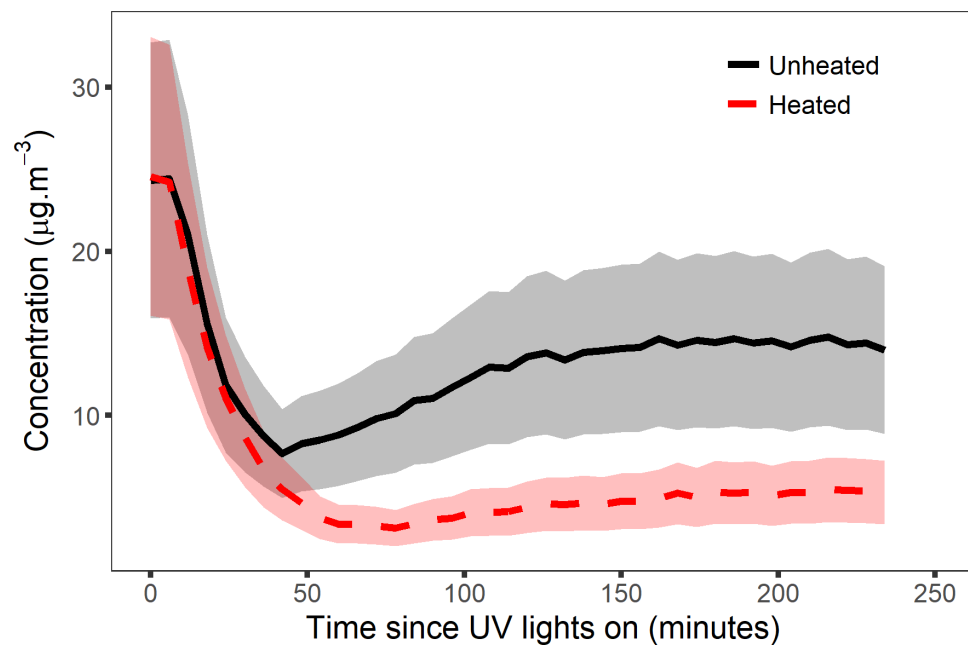

Figure S1: Total non-refractory mass concentrations observed during seeded SOA formation, at both ambient temperature and after heating the sample to 120°C. The shaded area represents the cumulative uncertainties in each major AMS species.

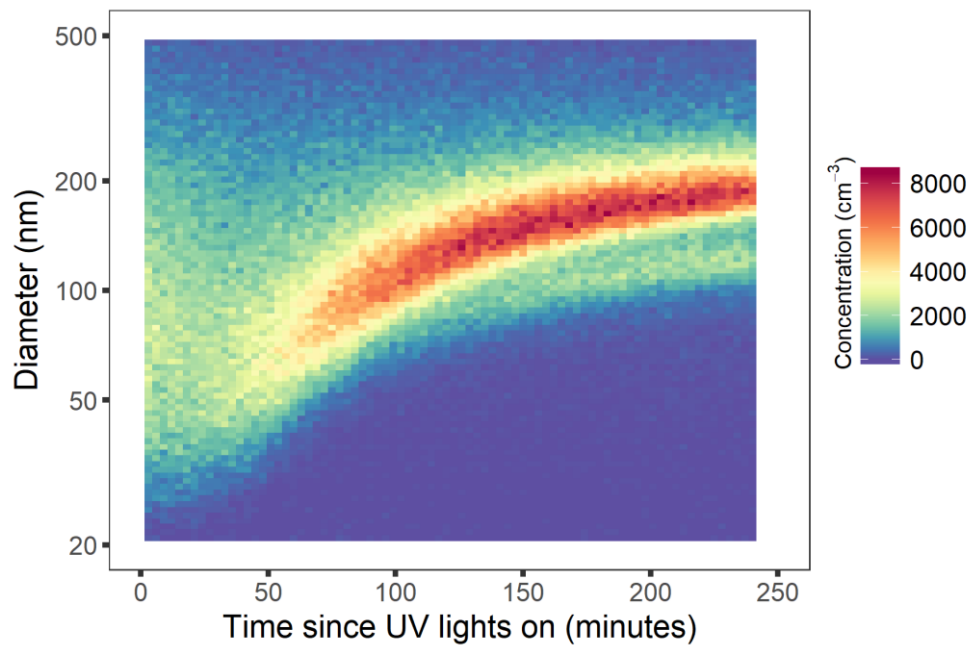

Figure S2: Size distributions of particle number concentration observed during four hours of  $\alpha$ -pinene SOA formation on polydisperse AS seed particles.

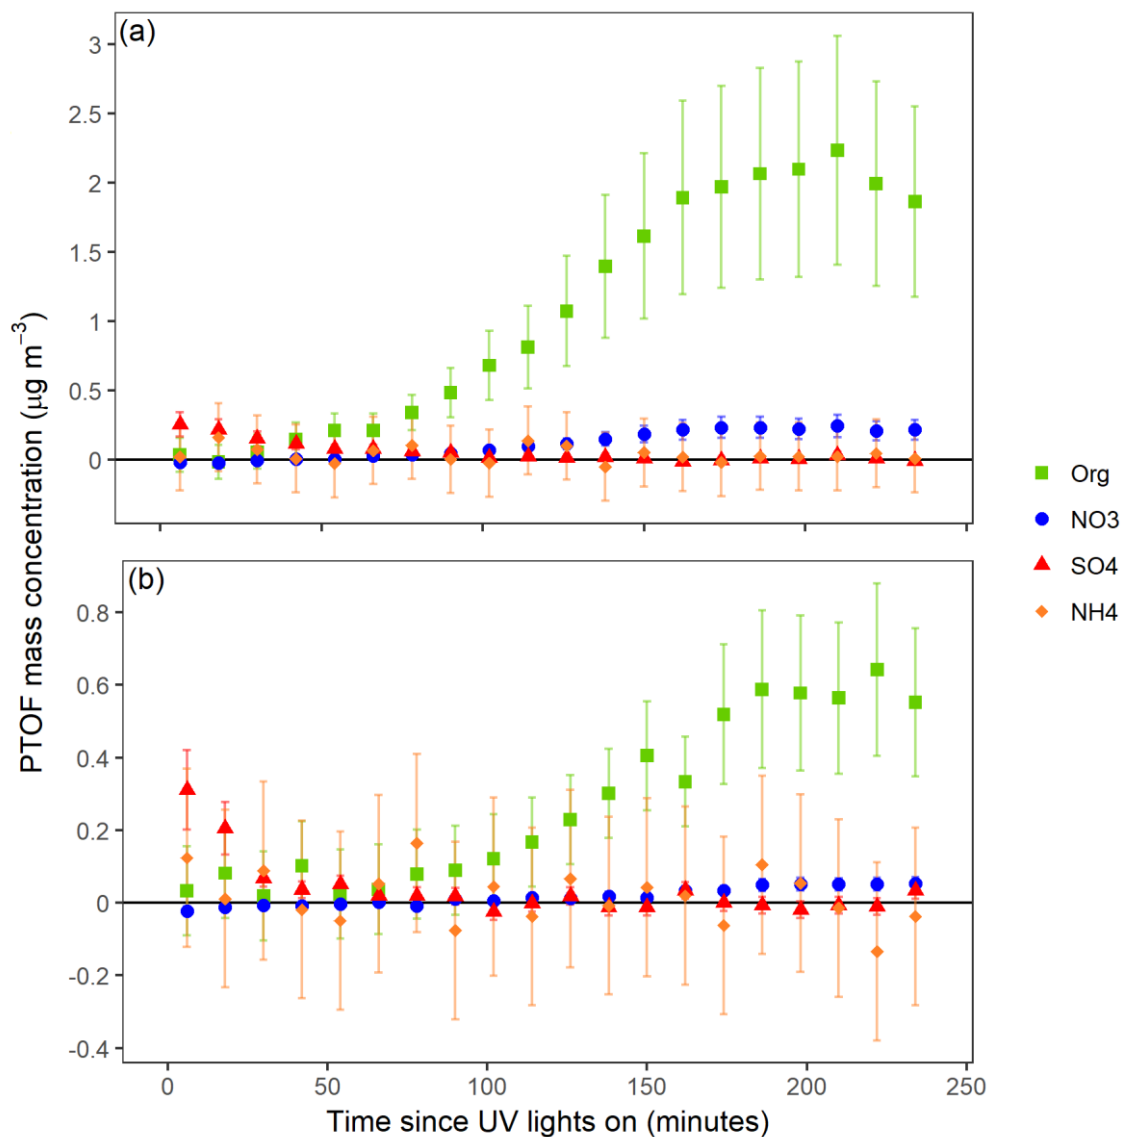

**Figure S3: Size-resolved mass concentrations of major AMS species (excluding Chl) observed during seeded SOA formation, when sampling through (a) an unheated line and (b) a thermodenuder heated to 120°C. Concentrations have been restricted to aerosol with  $130 < d_{va} < 180$  nm. The error bars represent the larger value of either their respective detection limits or estimated uncertainties of 37% for organics, 35% for SO<sub>4</sub> and Chl, and 33% for NO<sub>3</sub> and NH<sub>4</sub>.**
